# Supplementary material
Source: Royal Society of Chemistry journal article supplement (doi:10.1039/d6va00120c)
Supplement: d6va00120c1.pdf [file d6va00120c1.pdf]

1 **Bio- and Chemically Synthesized ZnO Nanoparticles for Textile Wastewater Treatment**  
2 **and Phytotoxicity Alleviation in *Vigna radiata***

3 Fatima Batool<sup>a,b</sup>, Muhammad Zubair<sup>b</sup>, Faisal Mahmood<sup>a</sup>, Muhammad Shahid<sup>c</sup>, Tanvir Shahzad<sup>a</sup>,  
4 Weitao Liu<sup>d</sup>, Sabir Hussain<sup>a\*</sup>, Aman Ullah<sup>b\*</sup>

5 <sup>a</sup> *Department of Environmental Sciences, Government College University Faisalabad, Faisalabad,*  
6 *38000, Pakistan*

7 <sup>b</sup> *Department of Agricultural, Food & Nutritional Science, Faculty of ALES, University of Alberta*  
8 *4-10 Agriculture/Forestry Centre Edmonton, AB, T6G 2P5*

9 <sup>c</sup> *Department of Bioinformatics and Biotechnology, Government College University Faisalabad,*  
10 *Faisalabad, 38000, Pakistan*

11 <sup>d</sup> *MOE Key Laboratory of Pollution Processes and Environmental Criteria, College of*  
12 *Environmental Science and Engineering, Nankai University, Tianjin 300350, China*

13

14

15

16

17 *\*: Correspondence authors*

18 *[sabirghani@gmail.com](mailto:sabirghani@gmail.com); [sabir.hussain@gcuf.edu.pk](mailto:sabir.hussain@gcuf.edu.pk)*

19 *[ullah2@ualberta.ca](mailto:ullah2@ualberta.ca)*

20

## 21 **S.1 Material and Methods**

### 22 **S.1.1 Decolorization of dyes at their different concentrations**

23 After optimization, the optimum concentration of nanoparticles was used for the decolorization of  
24 MB, CR, RB-5, MG, and RR-2 at 25, 50, and 75 ppm. For this purpose, the optimum concentration  
25 of ZnO-NPs was mixed to each dye solution (n=3) and placed for solar incubation. At specific  
26 time intervals, small aliquots were taken from each sample and subjected to spectrophotometry to  
27 estimate the effect of the optimum dosage of NPs on decolorizing dyes at different concentrations.

28

### 29 **S.1.2 Decolorization of dyes under different incubation conditions**

30 The potential of ZnO-NPs was estimated for removal of dyes (50 ppm) under dark and light  
31 condition. A 40 W UV black light florescent bulb, white LED light, and nautural sunlight  
32 conditions (Experimental Month= June; Solar irradiance range= 800 to 1000 W m<sup>-2</sup>; Experimental  
33 site= GCUF, Faislabad, Pakistan) were used as a light sources. Samples with different dye  
34 solutions (50 ppm concentration; n=3) and optimum concentrations of nanoparticles were placed  
35 under each light source for a particular time. The 2 mL of aliquots was taken from each sample,  
36 centrifuged (7000 rpm) and the decolorization % was estimated using a spectrophotometer at  
37 specific wavelengths of each dye.

### 38 **S.1.3 Decolorization of dyes in presence of reducing agent**

39 The optimum dosage of ZnO-NPs was used for the decolorization of tested dyes using NaBH<sub>4</sub> as  
40 a reducing agent. After adding NaBH<sub>4</sub> (3:1) and nanomaterials to each dye solution (n=3), the  
41 reaction solution was placed in dark. Approximately 2 mL of sample were taken from each reaction

42 solution after particular time intervals and subjected to UV-visible spectrophotometer to determine  
43 the rate of degradation of each dye.

## 44 **S.2 Results**

### 45 **S.2.1 Decolorization of dyes at their different concentrations**

46 After optimization, the optimum dosage of ZnO-NPs was used for the decolorization of azo dyes  
47 at different concentrations (**Fig. S1**). The maximum decolorization with the application of ZnO(B)-  
48 NPs was observed for CR dye at a concentration of 25 ppm, followed by MG, MB, RB-5, and RR-  
49 2. A similar trend was observed with the treatment of ZnO(C)-NPs, but their potential was found  
50 to be less than that of the biologically synthesized counterparts. The decolorization potential of the  
51 nanomaterials decreased with increasing dye concentration. At 50 ppm, the maximum  
52 decolorization was again observed in CR, followed by MG, MB, RB-5 and RR-2 by ZnO(B)-NPs.  
53 In the case of ZnO(C)-NPs, the removal efficiencies for MB, RR-2, and RB-5 were similar;  
54 however, after 1 h, the following decolorization rate was observed: CR>MG > MB>RB-5 > RR-  
55 2. This increasing decolorization in CR, MG, and MB might be due to the simple chromophoric  
56 structure and azo bonds, which are easily attached by hydroxyl and superoxide radicals generated  
57 by ZnO-NPs. Conversely, reactive dyes have more complex structures (sulfonate aromatic group)  
58 and bonds, making them difficult to remove.<sup>1</sup> The potential of nanomaterials was significantly  
59 reduced at 75 ppm of dye, and the decolorization trend of both nanomaterials for MB, RR-2, and  
60 RB-5 were similar and lower than that at 25 and 50 ppm. The findings of this experiment are  
61 aligned with the studies of Bagheri et al.<sup>2</sup>, Farouq et al.<sup>3</sup>, Shubha et al.<sup>4</sup>. They reported that as the  
62 dye concentration increased, the transparency of the solutions decreased, which absorbed UV light  
63 from the sun, making it less available for catalysts. Meanwhile, it also reduced the production of  
64 hydroxyl ions, which are required for the photocatalytic degradation of dyes.<sup>4</sup> Bagheri et al.<sup>2</sup>

65 reported that dye decolorization may occurs by the transfer of electrons from the surface of ZnO-  
66 NPs to dye molecules. As the dye concentration increases, the production of electrons and holes  
67 may decrease, which can reduce the decolorizing potential of the NPs.

68 The results of this experiment were further confirmed by heat map and principal component  
69 analysis. PCA of variables (**Fig. S1G**) confirmed the results, where Dim1 contributed  
70 approximately 87.9 % and Dim2 approximately 6.2% of the variance. This indicates that the  
71 decolorization of each dye follows a uniform kinetic trend, and the closeness of the vectors  
72 suggests that they are positively correlated. In the PCA of treatments (**Fig. S1H**), experimental  
73 variables were grouped based on dye concentration (25, 50, and 75 ppm). The 75 ppm confidence  
74 ellipses along Dim1 and Dim2 indicated that the dye concentration had a significant impact on the  
75 degradation pathway compared to lower concentrations. The heatmap (**Fig. S1I**) shows a high  
76 degree of similarity in the degradation rate of all tested dyes, while its hierarchical clustering  
77 identifies the role of catalysts in degrading different concentrations of dyes in different time  
78 intervals. In the heatmap, blue indicates the least decolorization, and red indicates the maximum  
79 decolorization of dyes.

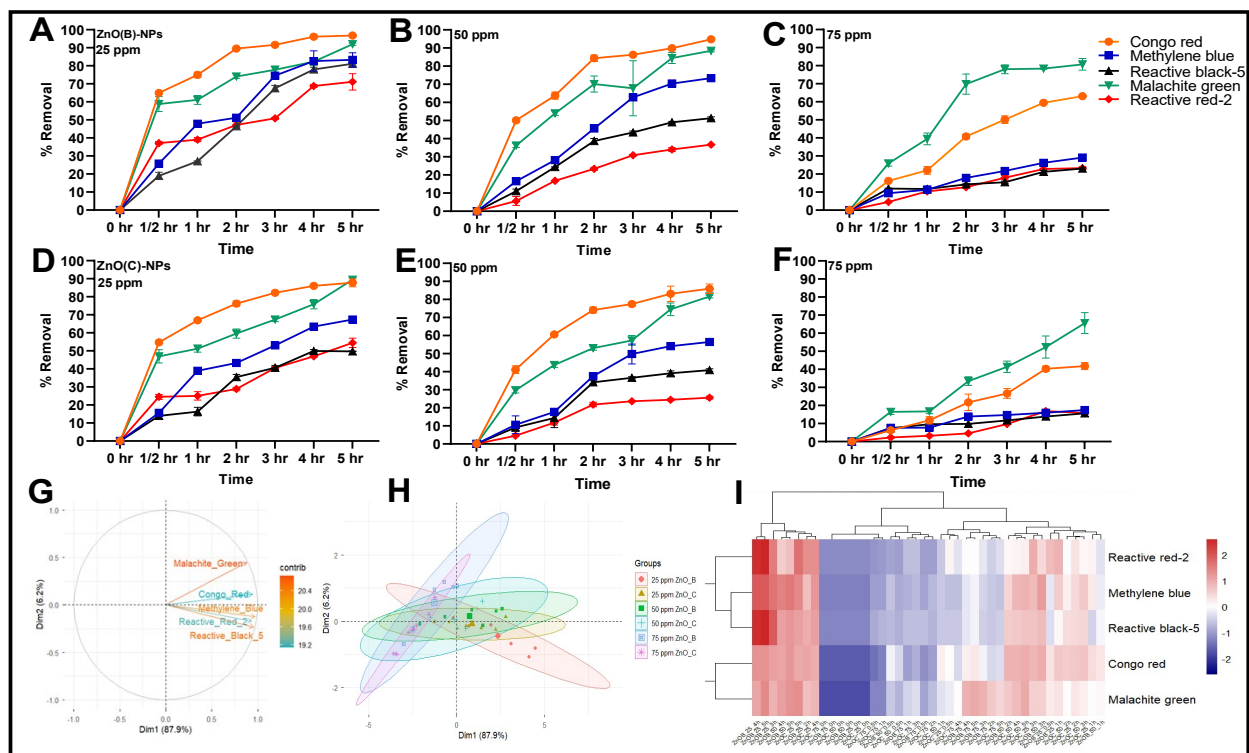

80  
81

82 **Fig. S1** Decolorization of azo dyes using optimized concentrations of prepared ZnO-NPs at 25,  
83 50, and 75 ppm of dye from simulated wastewater. Line graphs represent the decolorization of  
84 dyes while PCA and heat map demonstrate the multivariate analysis. Error bars represent the  
85 standard deviation (n=3)

### 86 S.2.2 Decolorization of dyes under different incubation conditions

87 **Fig. S2** shows the potential of ZnO(B) and ZnO(C) NPs in decolorizing different azo dyes in the  
88 dark and under different light sources. The minimum decolorization was observed during dark  
89 incubation compared to other light sources. It might be due to the activation of adsorption process  
90 rather than photocatalytic activity. Under UV-light incubation, the maximum decolorization for  
91 all dyes were observed, with CR and MG showing decolorization of more than 90 %. Conversely,  
92 the presence of white light moderately decolorized the azo dyes.

93 Meanwhile, sunlight incubation resulted in high removal of dyes comparable to the decolorizing  
94 potential of UV light because of its broad wavelength range. Under light conditions, ZnO-NPs  
95 may act as photocatalysts and produced reactive oxygen species such as hydroxyl and superoxide  
96 radicals<sup>5,6</sup>, which may help in oxidative degradation of dyes into simple compounds as reported in  
97 peroxide-mediated oxidation systems.<sup>7</sup> The findings of the whole study are compared with other  
98 studies and summarized in **Table S1**. Basically, electrons from valance band (VB) triggered to the  
99 conductance band (CB) on exposure of light energy that is more than the band gap of ZnO-NPs  
100 (Equation 1).<sup>8</sup>

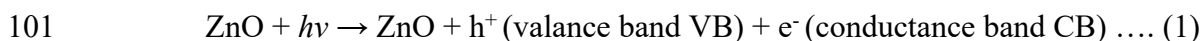

102 Then, the oxygenation of water molecules and surface hydroxyl groups occurs and is converted  
103 into hydroxyl radicals (Equations 2 and 3).

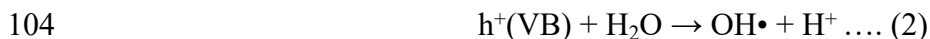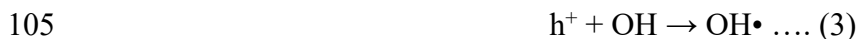

106 On the other hand, superoxide radicals were also produced when oxygen in the dissolved form  
107 reacted with the electrons of the conduction band (Equation 4).

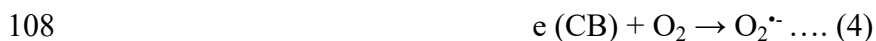

109 These reactive oxygen species in the form of superoxide and hydroxyl radicals degrade the dyes  
110 into simple molecules and less harmful compounds such as CO<sub>2</sub>, H<sub>2</sub>O, and inorganic ions  
111 (Equation 5).<sup>9</sup>

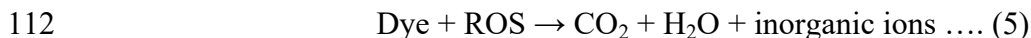

113 During multivariate analysis, the PCA analysis of dye decolorization (**Fig. S2I**) showed that DIM  
114 1 contributed approximately 87.9% and DIM 2 approximately 6.2% of the variance. All the dyes  
115 exhibited positive relationships, which suggest that they follow specific degradation trends.

116 Additionally, the PCA analysis in **Fig. S2J** shows the impact of light sources on the decolorization  
 117 of each dye. The sun and UV light were toward DIM 1, showing more decolorization, while dark  
 118 and white light were toward DIM 2, showing less decolorization of dyes, which further confirmed  
 119 our results. The heatmap analysis (**Fig. S2K**) confirmed that each incubation condition had a  
 120 significant influence on dye decolorization. In it, UV and sunlight are represented by red color  
 121 showing maximum decolorization of dyes, while blue color is attributed to dark and white light,  
 122 showing the least decolorization.

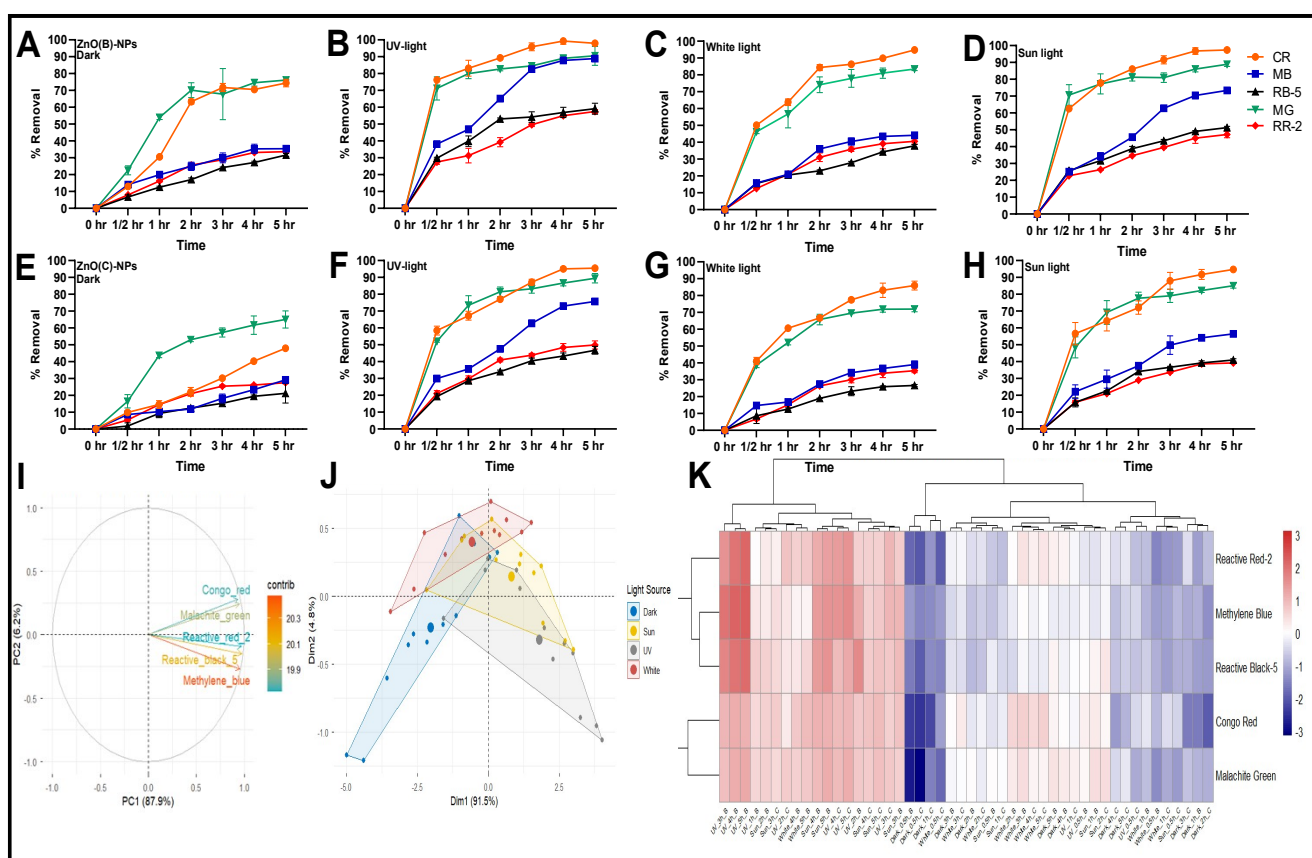

123  
 124 **Fig. S2** Decolorization of azo dyes from synthetic wastewater using ZnO-NPs under dark, UV  
 125 light, white light, and sunlight conditions. Line graphs represent the decolorization of dyes while  
 126 PCA and heat map demonstrate the multivariate analysis. Error bars are the standard deviation  
 127 (n=3)

128 **S.2.3 Decolorization of dyes in presence of reducing agent**

129 The synergistic potential of ZnO(C) and ZnO(B) NPs, with and without NaBH<sub>4</sub>, was also assessed  
130 for the decolorization of dyes in synthetic wastewater (**Fig. S3**). It was noticed that maximum  
131 decolorization was demonstrated by the treatment of NPs+NaBH<sub>4</sub>. Al-Shehri et al.<sup>10</sup> reported that  
132 the process of removing dyes is increased with the addition of NaBH<sub>4</sub> and NPs. Additionally,  
133 decolorization was most prominent in CR, followed by MG, MB, and RR-2, and it increased with  
134 time. CR, MG, and MB showed the highest removal across all the treatments whereas RR-2 and  
135 RB-5 showed slower degradation due to their complex molecular structures. It was observed that  
136 biosynthesized ZnO-NPs showed more potential with NaBH<sub>4</sub> as compared to their chemically  
137 synthesized counterparts. Basically, the addition of NaBH<sub>4</sub> increases the reduction of azo bonds  
138 which breakdown the structure of azo dyes.<sup>11</sup> This process produced intermediate byproducts  
139 which may be further degraded by nanomaterials. This mutual interaction between the catalyst and  
140 reducing agent may also be responsible for the increased removal rate of dyes.

141 Further, PCA analysis (**Fig. S3F**) showed the positive loading of all dyes along Dim1 (92.6%)  
142 which proves the behavior of dye degradation is controlled mainly by one common factor, namely  
143 catalytic activity. Congo red and malachite green had relatively higher contributions, indicating  
144 that they were more responsive to the applied treatments than the others. The PCA of the treatments  
145 (**Fig. S3G**) showed that ZnO(B) and ZnO(B)+NaBH<sub>4</sub> were placed towards the positive side of  
146 Dim1, which shows a better degradation capacity, while NaBH<sub>4</sub> was on the negative side,  
147 indicating that it is not an efficient catalyst. Intermediate positions were taken by ZnO(C) and  
148 ZnO(C)+NaBH<sub>4</sub>, indicating that they were moderately effective. The heatmap analysis (**Fig. S3H**)  
149 showed the degradation of dyes using reducing agent under specific time intervals. In the map, red  
150 indicates a positive relationship (more decolorization) and blue indicate a negative relationship

151 (less decolorization). The application of ZnO(B)-NPs with reducing agent outperformed the other  
 152 catalyst by showing more red hues.

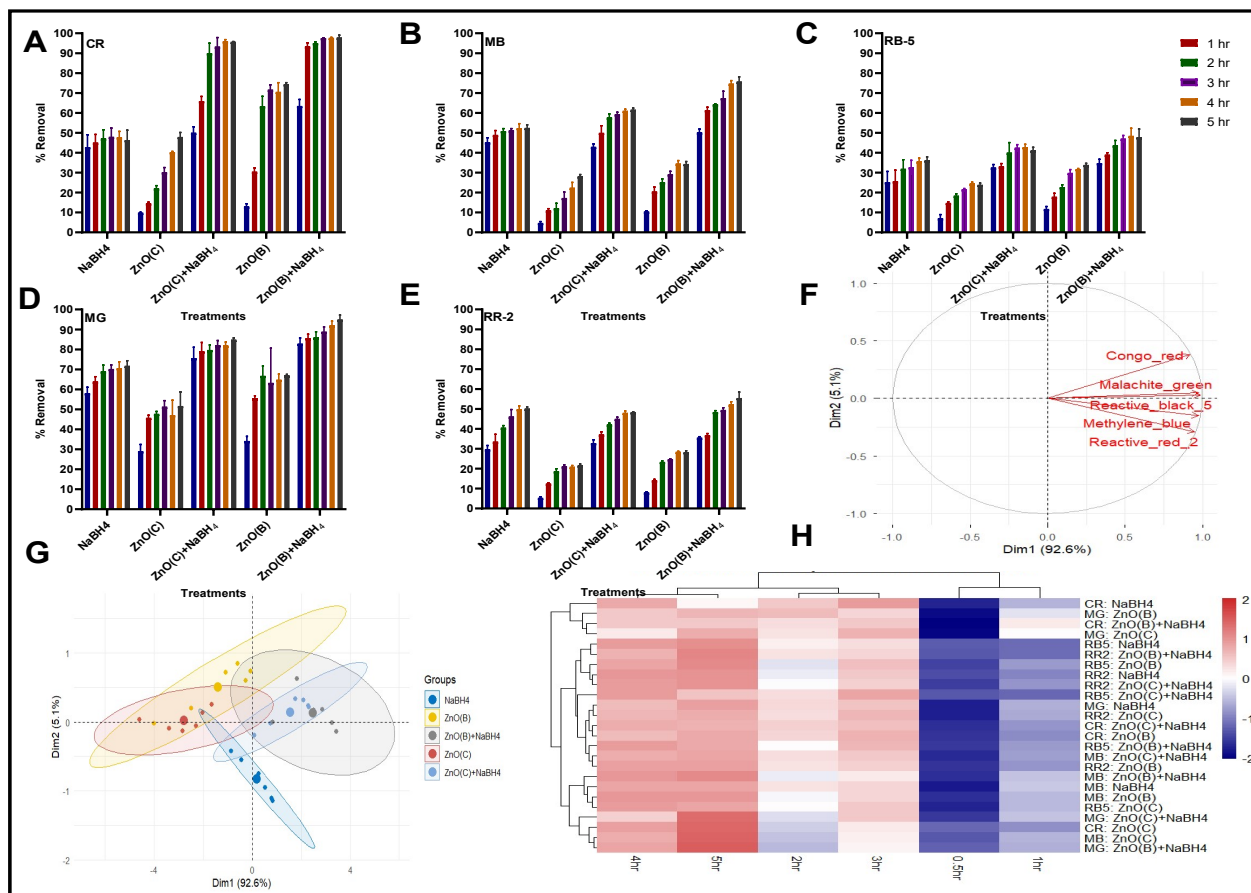

153  
 154

155 **Fig. S3** Decolorization of azo dyes from synthetic wastewater using ZnO-NPs with and without  
 156 reducing agent (NaBH<sub>4</sub>). Bar graphs represent the decolorization of dyes while PCA and heat map  
 157 demonstrate the multivariate analysis. Error bars represent the standard deviation (n=3)

158

159

160

161

162 **Figures**

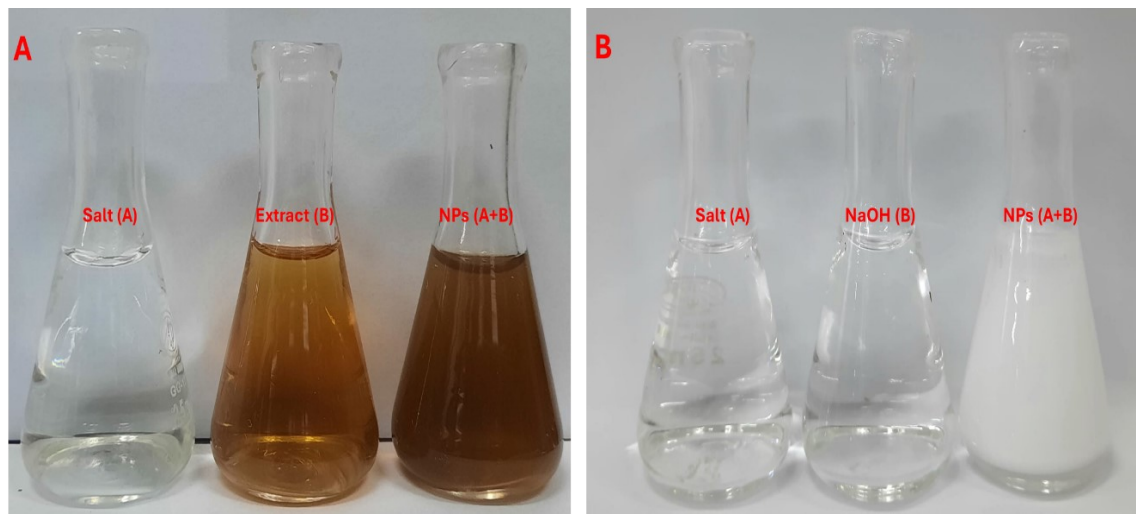

163

164 **Fig. S4** Visual representation of change in color from yellow to brownish during bio (A) and  
165 transparent to milky during chemical (B) synthesis of ZnO-NPs

166

169 **Table S1** Comparison of decolorization of dyes using ZnO-NPs with other studies

| Catalyst | Synthesis Route                                                          | Pollutant                                                                                          | Catalyst Conc.            | Pollutant Conc.        | Incubation Source | Removal Efficiency                                                                                                                       | Reference |
|----------|--------------------------------------------------------------------------|----------------------------------------------------------------------------------------------------|---------------------------|------------------------|-------------------|------------------------------------------------------------------------------------------------------------------------------------------|-----------|
| ZnO-NPs  | Microbial via <i>Pseudochromobacterium</i> sp. and Chemically using NaOH | Brilliant Blue R (BB-R), Brilliant Yellow (BY), Reactive Red 2 (RR-2), and Reactive Black 5 (RB-5) | 10 mg 10 mL <sup>-1</sup> | 200 mg L <sup>-1</sup> | Sun light         | BB-R (83.2%), BY (83.1%), RR-2 (88.8%), and RB-5 (95.2%) by biosynthesized and 58.2, 61.5, 81.4, and 85.4% by chemically synthesized NPs | 12        |
|          | Chemical Precipitation                                                   | Indigo Carmine                                                                                     | 0.75 g L <sup>-1</sup>    | 100 mg L <sup>-1</sup> | UV light          | 92%                                                                                                                                      | 13        |
|          | Chemical Precipitation                                                   | Chemical Oxygen Demand                                                                             | 0.75 g L <sup>-1</sup>    | -                      | UV light          | 74%                                                                                                                                      | 13        |
|          | Direct Precipitation                                                     | Leather dye                                                                                        | 0.5 mg mL <sup>-1</sup>   | 300 mg L <sup>-1</sup> | Sun light         | 90%                                                                                                                                      | 14        |

---

n

Biosynthesis of Congo red  
via *G. pulchellum*  
and  
chemically synthesized  
via NaOH  
as reducing agents

|           |                           |        |   |                                                   |    |
|-----------|---------------------------|--------|---|---------------------------------------------------|----|
| Congo red | 0.1 g 10 mL <sup>-1</sup> | 50 ppm | - | 100% by bio and 82% by chemically synthesized NPs | 15 |
|-----------|---------------------------|--------|---|---------------------------------------------------|----|

*Gynostemma*  
*a* plant  
extract

|                 |                        |                       |          |     |    |
|-----------------|------------------------|-----------------------|----------|-----|----|
| Malachite green | 200 mg L <sup>-1</sup> | 10 mg L <sup>-1</sup> | UV light | 89% | 16 |
|-----------------|------------------------|-----------------------|----------|-----|----|

*Punica*  
*granatum*

|                |                        |                       |          |       |    |
|----------------|------------------------|-----------------------|----------|-------|----|
| Methylene blue | 20 µg mL <sup>-1</sup> | 10 mg L <sup>-1</sup> | UV light | 93.4% | 17 |
|----------------|------------------------|-----------------------|----------|-------|----|

Chemically using NaOH  
as reducing agent

|            |        |         |          |     |    |
|------------|--------|---------|----------|-----|----|
| Methyl red | 0.02 g | 100 ppm | UV light | 90% | 18 |
|------------|--------|---------|----------|-----|----|

*Conocarpus*  
*erectus* leaf  
extract

|                                       |                         |        |                 |                                                           |               |
|---------------------------------------|-------------------------|--------|-----------------|-----------------------------------------------------------|---------------|
| Congo red (CR)<br>Methylene blue (MB) | 0.5 mg mL <sup>-1</sup> | 50 ppm | UV and Sunlight | CR upto 97%<br>MB upto 88%<br>MG upto 90%<br>RB5 upto 59% | Current study |
|---------------------------------------|-------------------------|--------|-----------------|-----------------------------------------------------------|---------------|

|                                         |                        |                       |        |                 |  |                                                                           |               |
|-----------------------------------------|------------------------|-----------------------|--------|-----------------|--|---------------------------------------------------------------------------|---------------|
|                                         | Malachite green (MG)   |                       |        |                 |  | RR2 upto 57%                                                              |               |
|                                         | Reactive black 5 (RB5) |                       |        |                 |  |                                                                           |               |
|                                         | Reactive red 2 (RR2)   |                       |        |                 |  |                                                                           |               |
| Chemically using NaOH as reducing agent | Congo red (CR)         | 2 mg mL <sup>-1</sup> | 50 ppm | UV and Sunlight |  | CR upto 95%<br>MB upto 75%<br>MG upto 89%<br>RB5 upto 46%<br>RR2 upto 49% | Current study |
|                                         | Methylene blue (MB)    |                       |        |                 |  |                                                                           |               |
|                                         | Malachite green (MG)   |                       |        |                 |  |                                                                           |               |
|                                         | Reactive black 5 (RB5) |                       |        |                 |  |                                                                           |               |
|                                         | Reactive red 2 (RR2)   |                       |        |                 |  |                                                                           |               |

170

171 **Table S2** Comparison of impact of ZnO-NPs on health of different crops with other studies

| Catalysts | Plant                            | NPs Dosage            | Stress   | Impact                                                    | Reference     |
|-----------|----------------------------------|-----------------------|----------|-----------------------------------------------------------|---------------|
| ZnO-NPs   | <i>Oryza sativa</i> L.<br>(Rice) | 50 mg L <sup>-1</sup> | Salinity | NaCl reduced the root, shoot length, chlorophyll content, | <sup>19</sup> |

---

|                                         |                        |         |                                                                                                                                                                                                                                                                                                                                                                                                                     |    |
|-----------------------------------------|------------------------|---------|---------------------------------------------------------------------------------------------------------------------------------------------------------------------------------------------------------------------------------------------------------------------------------------------------------------------------------------------------------------------------------------------------------------------|----|
|                                         |                        |         | carotenoid, APX, and SOD contents while increased the MDA. The application of ZnO-NPs not only increases the growth and photosynthetic contents but also reduces the MDA, under salt stress.                                                                                                                                                                                                                        |    |
| <i>Lycopersicon esculentum</i> (tomato) | 50 mg L <sup>-1</sup>  | Cadmium | Cd (0.8 mM) decreased the shoot length by 28%, root length by 31%, shoot fresh mass by 32%, root fresh mass by 29%, shoot dry mass by 28%, root dry mass by 31%, and leaf area by 32%. The application of ZnO-NPs reduced the impact of Cd stress by increasing CAT by 51%, POX by 47%, and SOD by 51% activities. It also decreased the MDA, H <sub>2</sub> O <sub>2</sub> and O <sub>2</sub> by 31%, 28%, and 31% | 20 |
| Cucumber                                | 100 mg L <sup>-1</sup> | Drought | Drought stress reduced the shoot fresh weight, dry weight,                                                                                                                                                                                                                                                                                                                                                          | 21 |

---

|                                  |                                  |                         |                                                                                                                                                                                                                                                           |                  |
|----------------------------------|----------------------------------|-------------------------|-----------------------------------------------------------------------------------------------------------------------------------------------------------------------------------------------------------------------------------------------------------|------------------|
|                                  |                                  |                         | <p>root fresh and dry weight by 25%, 55%, 59.35% and 41.65%. While ZnO-NPs at 100 mg L<sup>-1</sup> ameliorate the drought stress by enhancing shoot fresh weight and dry weight, root fresh, and dry weight by 80.06%, 271.95%, 158.0%, and 104.45%.</p> |                  |
| <i>Pisum sativum</i> L.<br>(Pea) | 50 and 100<br>mg L <sup>-1</sup> | Drought                 | <p>50 ppm of ZnO-NPs increased the growth, physiological, antioxidant, and mineral content by 35%, 45%, 57%, and 13% while 100 ppm enhanced it to 43%, 54%, 64%, and 15% under drought stress</p>                                                         | 22               |
| Wheat                            | 100 mg L <sup>-1</sup>           | Municipal<br>wastewater | <p>Under stress, 100 mg L<sup>-1</sup> of ZnO-NPs increased the SOD, POD, CAT, and APX by 55.4%, 26.7%, 48.5%, and 27.1%, as compared to control</p>                                                                                                      | 23               |
| <i>Vigna radiata</i>             | 100 mg L <sup>-1</sup>           | Textile<br>wastewater   | <p>Significantly improved the health of crop by reducing the</p>                                                                                                                                                                                          | Current<br>study |

---

172

173 **References**

174 1 L. M. Mahlaule-Glory and N. C. Hintsho-Mbita, Green derived zinc oxide (ZnO) for the  
175 degradation of dyes from wastewater and their antimicrobial activity: a review, *Catalysts*,  
176 2022, **12**, 833.

177 2 M. Bagheri, N. R. Najafabadi and E. Borna, Removal of reactive blue 203 dye  
178 photocatalytic using ZnO nanoparticles stabilized on functionalized MWCNTs, *J. King*  
179 *Saud Univ.*, 2020, **32**, 799–804.

180 3 R. Farouq, E. K. Ismaeel and A. M. Monazie, Optimized degradation of eosin dye through  
181 UV-ZnO NPs catalyzed reaction, *J. Fluoresc.*, 2022, **32**, 715–722.

182 4 J. P. Shubha, H. S. Savitha, R. C. Patil, M. E. Assal, M. R. Shaik, M. Kuniyil, O. Alduhaish,  
183 N. Dubasi and S. F. Adil, A green approach for the degradation of toxic textile dyes by  
184 nickel oxide (NiO-SD) NPs: Photocatalytic and kinetic approach, *J. King Saud Univ.*, 2023,  
185 **35**, 102784.

186 5 T. Sarkar and A. Bhattacharjee, Green synthesized ZnO nanocatalysts for rapid and  
187 effective visible-light degradation of industrial dyes, *RSC Adv.*, 2026, **16**, 2671–2684.

188 6 H. Chelghoum, N. Nasrallah, H. Tahraoui, M. F. Seleiman, M. M. Bouhenna, H.  
189 Belmeskine, M. Zamouche, S. Djema, J. Zhang and A. Mendil, Eco-friendly synthesis of  
190 ZnO nanoparticles for quinoline dye photodegradation and antibacterial applications using  
191 advanced machine learning models, *Catalysts*, 2024, **14**, 831.

- 192 7 D. Mukhopadhyay, P. Gupta, R. Patidar and V. C. Srivastava, Microbial peroxide producing  
193 cell mediated lignin valorization, *Int. J. Biol. Macromol.*, 2022, **202**, 431–437.
- 194 8 F. Kanwal, T. Javed, F. Hussain, M. Wasim and M. Batool, Enhanced dye photodegradation  
195 through ZnO and ZnO-based photocatalysts doped with selective transition metals: a  
196 review, *Environ. Technol. Rev.*, 2024, **13**, 754–793.
- 197 9 N. Siva, D. Sakthi, S. Ragupathy, V. Arun and N. Kannadasan, Synthesis, structural, optical  
198 and photocatalytic behavior of Sn doped ZnO nanoparticles, *Mater. Sci. Eng. B*, 2020, **253**,  
199 114497.
- 200 10 A. S. Al-Shehri, Z. Zaheer, A. M. Alsudairi and S. A. Kosa, Photo-oxidative Decolorization  
201 of Brilliant Blue with AgNPs as an Activator in the Presence of K<sub>2</sub>S<sub>2</sub>O<sub>8</sub> and NaBH<sub>4</sub>, *ACS*  
202 *omega*, 2021, **6**, 27510–27526.
- 203 11 R. S. Das, B. Singh, A. Mandal, R. Banerjee and S. Mukhopadhyay, Homogeneous  
204 Palladium Nanoparticles Surface Hosts Catalyzed Reduction of the Chromophoric Azo (–  
205 N= N–) Group of Dye, Acid Orange 7 by Borohydride in Alkaline Media, *Int. J. Chem.*  
206 *Kinet.*, 2014, **46**, 746–758.
- 207 12 K. Siddique, M. Shahid, T. Shahzad, F. Mahmood, H. Nadeem, M. Saif ur Rehman, S.  
208 Hussain, O. Sadak, S. Gunasekaran and T. Kamal, Comparative efficacy of biogenic zinc  
209 oxide nanoparticles synthesized by *Pseudochrobactrum* sp. C5 and chemically synthesized  
210 zinc oxide nanoparticles for catalytic degradation of dyes and wastewater treatment,  
211 *Environ. Sci. Pollut. Res.*, 2021, **28**, 28307–28318.
- 212 13 R. S. Ahmed, H. M. Hameed, M. W. Muayad, C. N. Salih, U. M. Nayef, A. A. Abed, A. M.  
213 Hussien and A. Awad, Photocatalytic Degradation of Indigo Carmine by Zinc Oxide

- 214 Nanoparticles: Effect of Experimental Parameters and Kinetic Degradation, *Plasmonics*,  
215 2025, 1–17.
- 216 14 V. Sharma, J. K. Sharma, V. Kansay, V. D. Sharma, A. Sharma, S. Kumar, A. K. Sharma  
217 and M. K. Bera, The effect of calcination temperatures on the structural and optical  
218 properties of zinc oxide nanoparticles and their influence on the photocatalytic degradation  
219 of leather dye, *Chem. Phys. Impact*, 2023, **6**, 100196.
- 220 15 M. A. Hassaan, S. Hosny, M. R. ElKatory, R. M. Ali, T. A. Rangreez and A. El Nemr, Dual  
221 action of both green and chemically synthesized zinc oxide nanoparticles: Antibacterial  
222 activity and removal of Congo red dye, *Desalin. Water Treat.*, 2021, **218**, 423–435.
- 223 16 J. K. Park, E. J. Rupa, M. H. Arif, J. F. Li, G. Anandapadmanaban, J. P. Kang, M. Kim, J. C.  
224 Ahn, R. Akter and D. C. Yang, Synthesis of zinc oxide nanoparticles from *Gynostemma*  
225 *pentaphyllum* extracts and assessment of photocatalytic properties through malachite green  
226 dye decolorization under UV illumination-A Green Approach, *Optik (Stuttg.)*, 2021, **239**,  
227 166249.
- 228 17 A. Fouda, E. Saied, A. M. Eid, F. Kouadri, A. M. Alemam, M. F. Hamza, M. Alharbi, A.  
229 Elkelish and S. E.-D. Hassan, Green synthesis of zinc oxide nanoparticles using an aqueous  
230 extract of *punica granatum* for antimicrobial and catalytic activity, *J. Funct. Biomater.*,  
231 2023, **14**, 205.
- 232 18 T. Gul, I. Khan, B. Ahmad, S. Ahmad, A. A. Alsaieri, M. Almeahmadi, O. Abdulaziz, A.  
233 Alsharif, I. Khan and K. Saeed, Efficient photodegradation of methyl red dye by kaolin clay  
234 supported zinc oxide nanoparticles with their antibacterial and antioxidant activities,  
235 *Heliyon*.

- 236 19 A. Singh, R. S. Sengar, V. D. Rajput, S. Agrawal, K. Ghazaryan, T. Minkina, A. R. M. Al  
237 Tawaha, O. M. Al Zoubi and T. Habeeb, Impact of zinc oxide nanoparticles on seed  
238 germination characteristics in rice (*Oryza sativa* L.) under salinity stress, *J. Ecol. Eng.*,  
239 2023, **24**, 142–156.
- 240 20 M. Faizan, A. Faraz, A. R. Mir and S. Hayat, Role of zinc oxide nanoparticles in countering  
241 negative effects generated by cadmium in *Lycopersicon esculentum*, *J. Plant Growth*  
242 *Regul.*, 2021, **40**, 101–115.
- 243 21 M. I. Ghani, S. Saleem, S. A. Rather, M. S. Rehmani, S. Alamri, V. D. Rajput, H. M. Kalaji,  
244 N. Saleem, T. A. Sial and M. Liu, Foliar application of zinc oxide nanoparticles: An  
245 effective strategy to mitigate drought stress in cucumber seedling by modulating antioxidant  
246 defense system and osmolytes accumulation, *Chemosphere*, 2022, **289**, 133202.
- 247 22 A. Ishfaq, I. Haidri, U. Shafqat, I. Khan, M. Iqbal, F. Mahmood and M. U. Hassan, Impact of  
248 biogenic zinc oxide nanoparticles on physiological and biochemical attributes of pea (*Pisum*  
249 *sativum* L.) under drought stress, *Physiol. Mol. Biol. Plants*, 2025, **31**, 11–26.
- 250 23 A. Ishfaq, I. Haidri, U. Shafqat, I. Khan, H. M. Rizwan, M. U. Hassan, M. Irfan, M. Adnan  
251 and F. Mahmood, Microbial Synthesis of ZnO Nanoparticles: A Green Strategy for  
252 Mitigating Wastewater Stress in Wheat (*Triticum aestivum*), *Water, Air, Soil Pollut.*, 2025,  
253 **236**, 518.
- 254
